# Supplementary material for: In vitro differentiation of human embryonic stem cells into ovarian follicle-like cells
Source: PubMed Central journal article supplement (PMC5472783; doi:10.1038/ncomms15680), 2017-06-12
Supplement: ncomms15680-s2.pdf [file ncomms15680-s2.pdf]

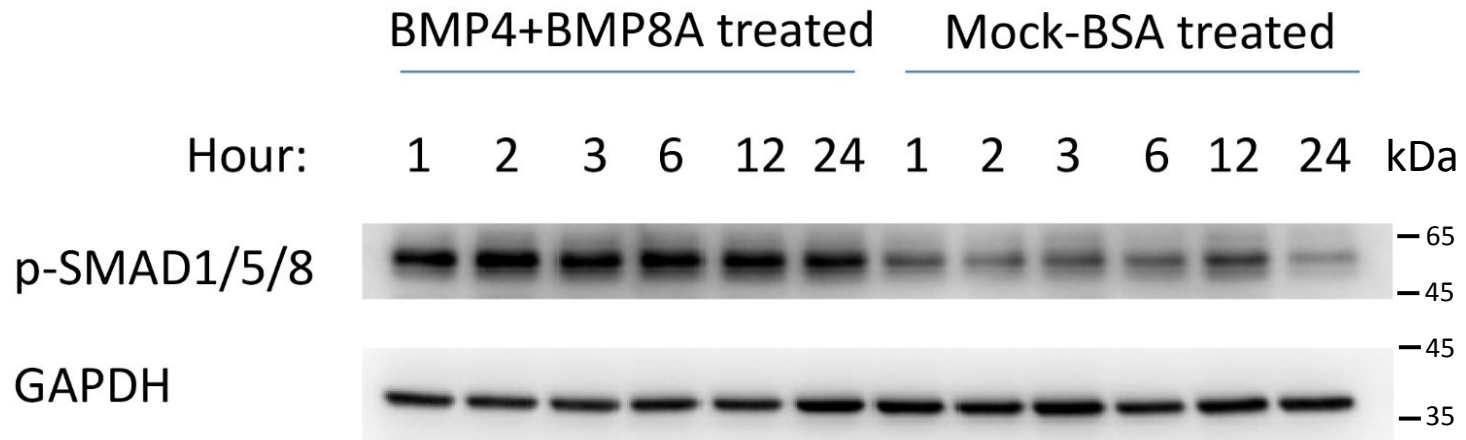

**Supplementary Figure 1. Western analysis of p-Smad1/5/8 of differentiated hESCs.** H9 hESCs were differentiated with or without BMP4+BMP8A and cell lysates were collected for Western analysis at indicated time point after the treatment. The same amount of protein was loaded for each time point and GAPDH was the loading control.

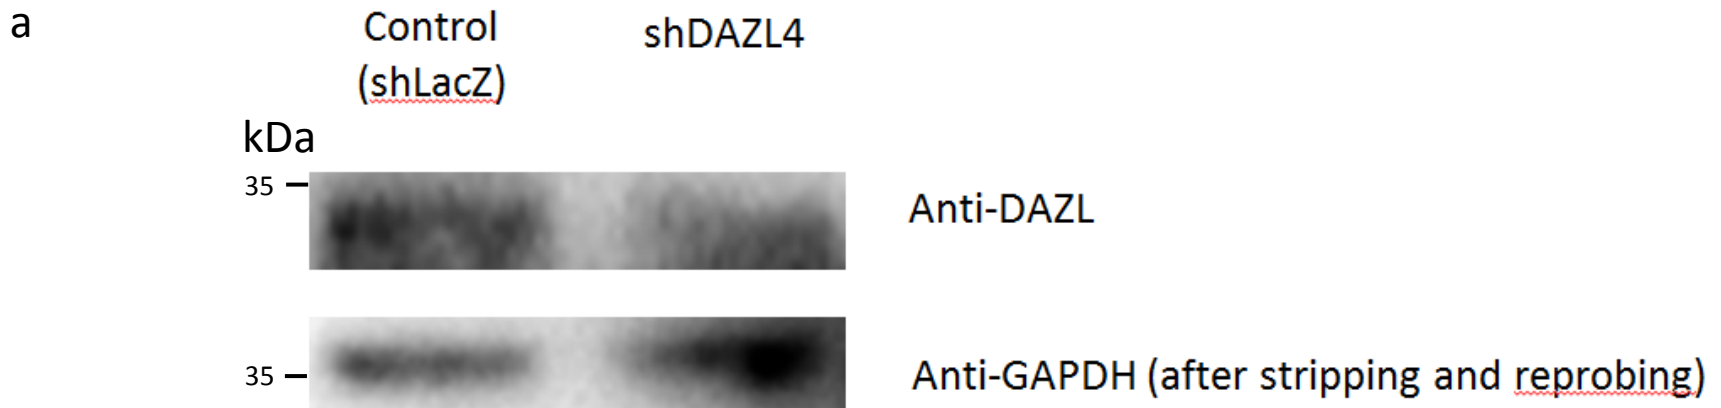

**b**

ImageJ measurement of intensity

|              | <u>Area</u> | <u>Mean</u>    | <u>Min</u> | <u>Max</u> |
|--------------|-------------|----------------|------------|------------|
| DAZL-C       | 6640        | <b>163.421</b> | 77         | 238        |
| DAZL-shDAZL  | 6640        | <b>122.413</b> | 51         | 198        |
| GAPDH-C      | 6437        | <b>119.689</b> | 41         | 196        |
| GAPDH-shDAZL | 6437        | <b>188.639</b> | 64         | 255        |

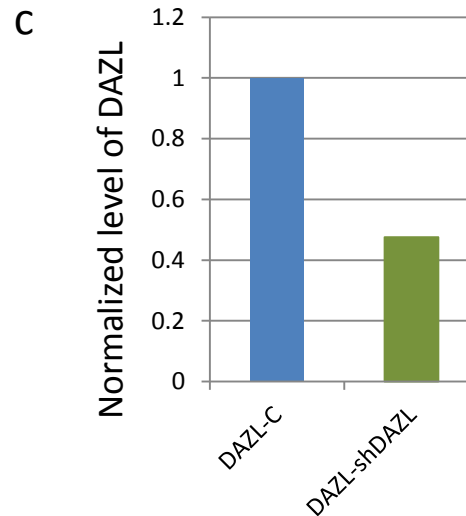

**Supplementary Figure 2. Silencing of DAZL in differentiated hESCs .** a. Western blots of DAZL and GAPDH. Differentiated hESCs at day6 were subjected to control of silencing vector (shLacZ) and shDAZL4 specifically targeting DAZL transcript. Although the expression of DAZL is low at this differentiated stage, the level of DAZL in the silencing group was reduced to half of the control group, supported by the measurement of intensity using ImageJ (b.) and calculated normalization level of DAZL (c.).

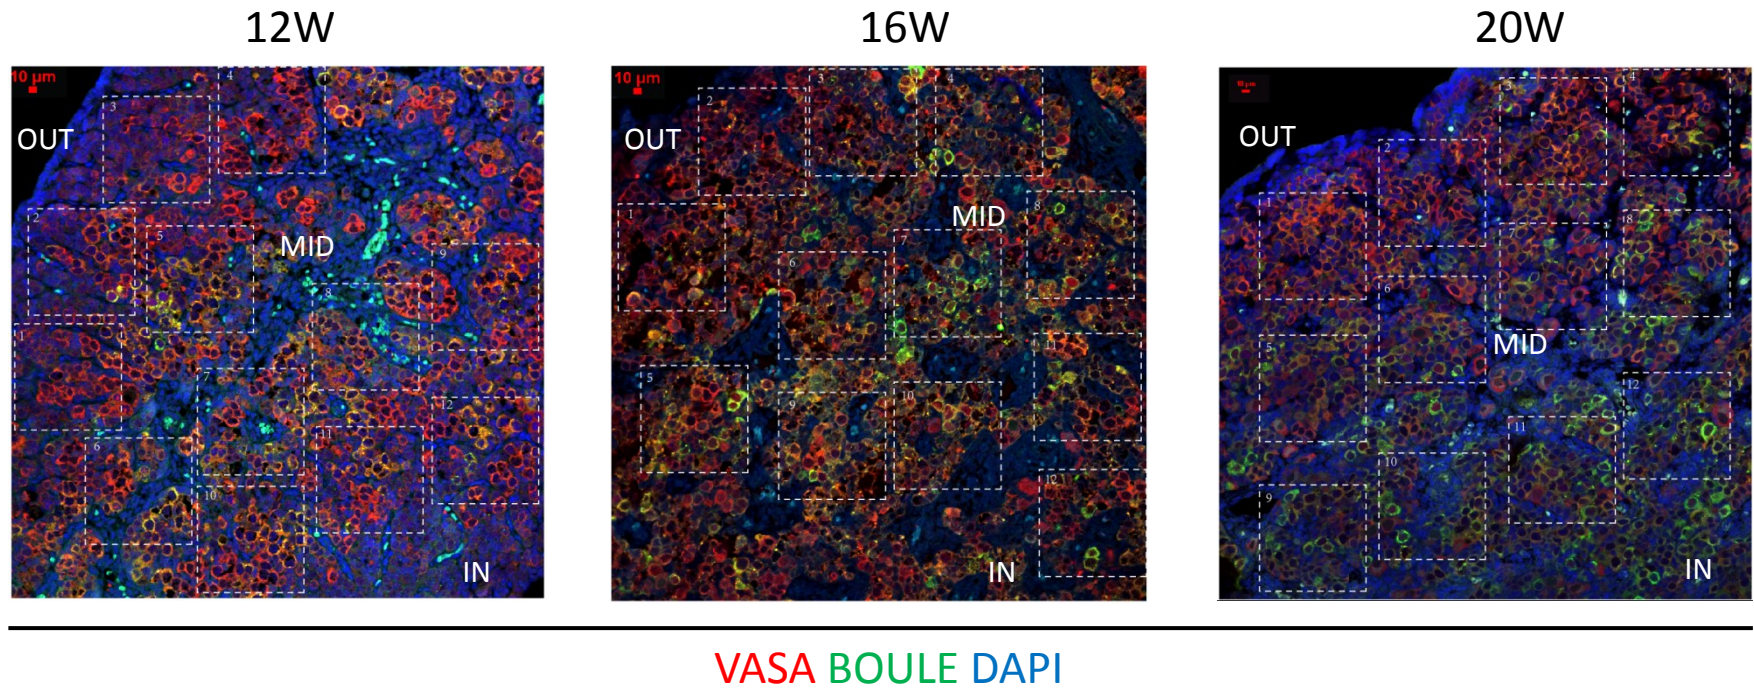

**Supplementary Figure 3. Distribution of BOULE positive germ cells in human fetal ovaries.** Coimmunostainings of VASA and BOULE were performed on the fetal ovaries of 12W to 20W. The stained sections were divided into 12 different areas, and each area was labelled at the upper left corner. Area 1-4 were resided at the outer cortex, Area 5-8 were resided in the middle cortex and Area 9-12 were resided at the inner cortex. Only VASA positive cells were considered as germ cells and 50-117 germ cells were counted in each area. The percentage of BOULE positive cells were calculated by dividing the total number of BOULE positive cells by the total number of VASA positive cells in each area.

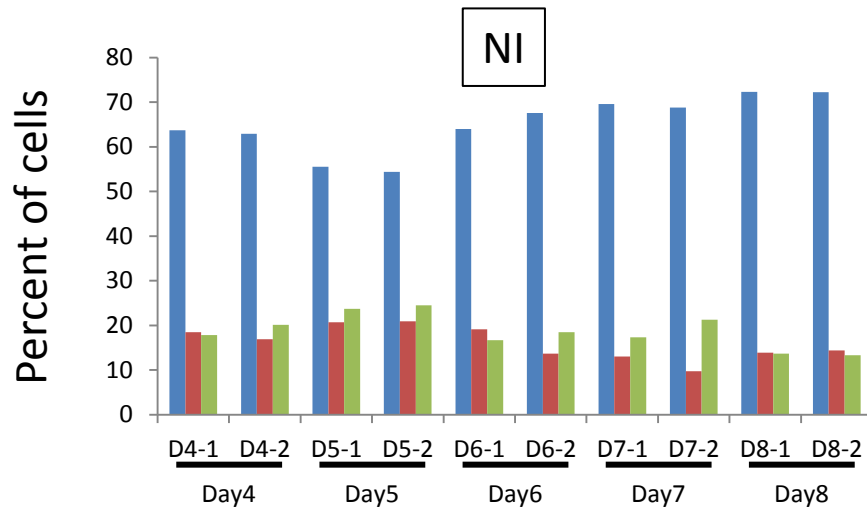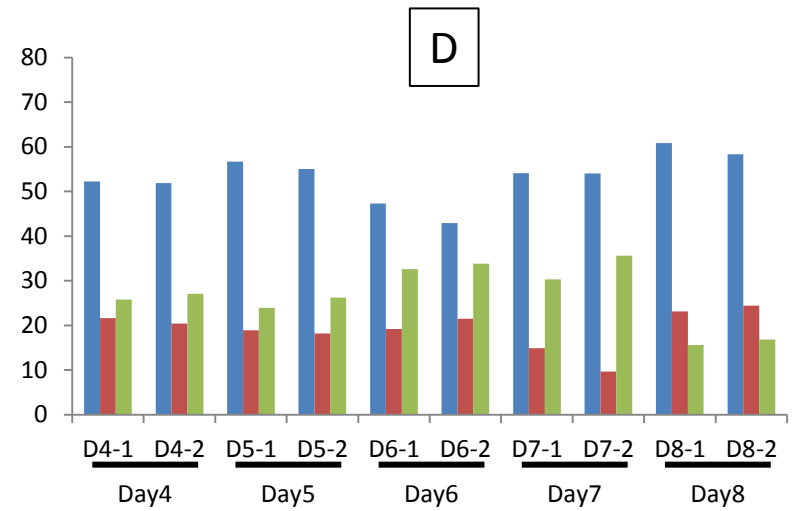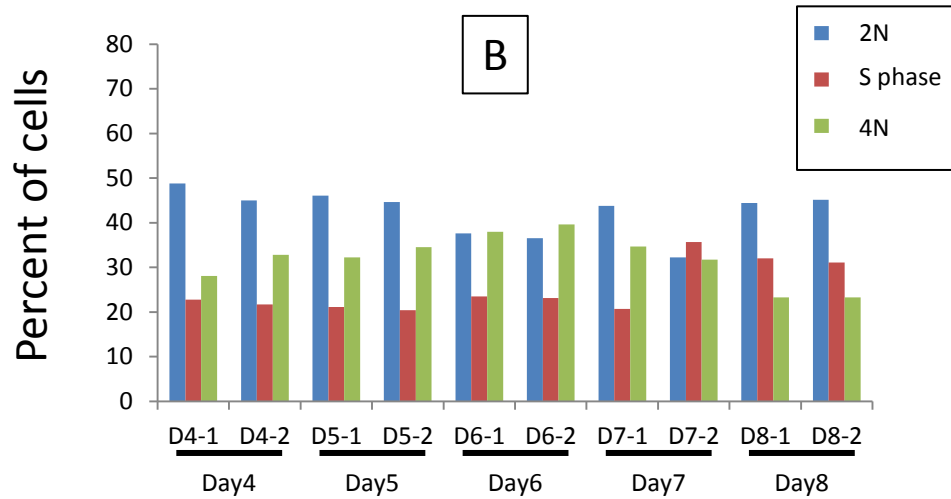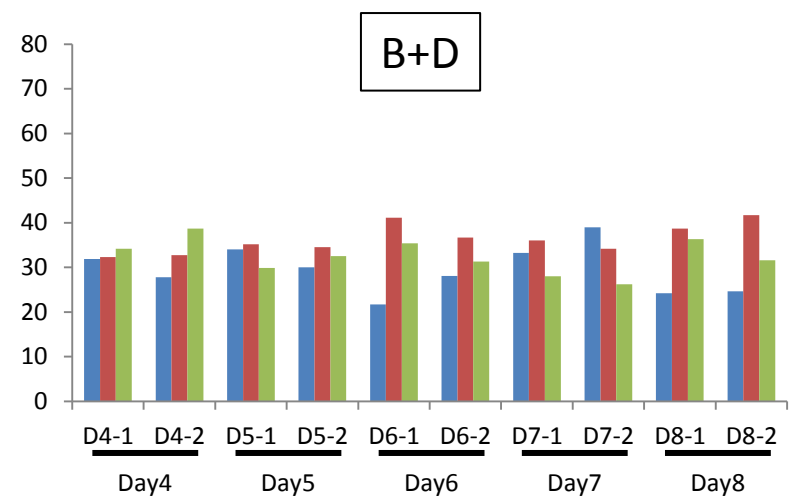

**Supplementary Figure 4.** Percent of cells with different DNA content. NI, D, B, and B+D cells in 2N, S phase, or 4N from day4(D4) to day8(D8), each sample set had two biological replicates(D4-1 and D4-2) at each time point with >500,000 cells subjected to FACS analysis in each sample.

DAPI

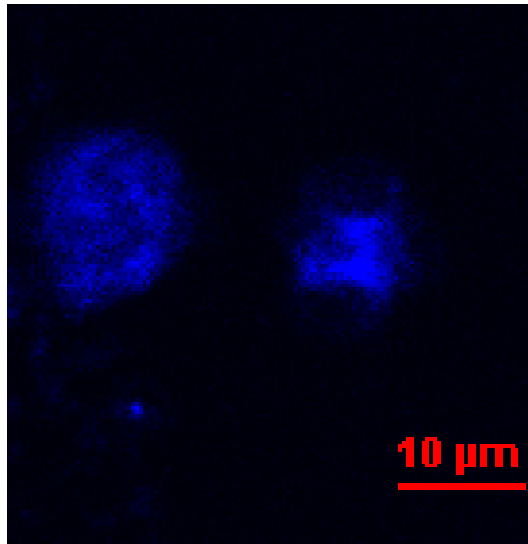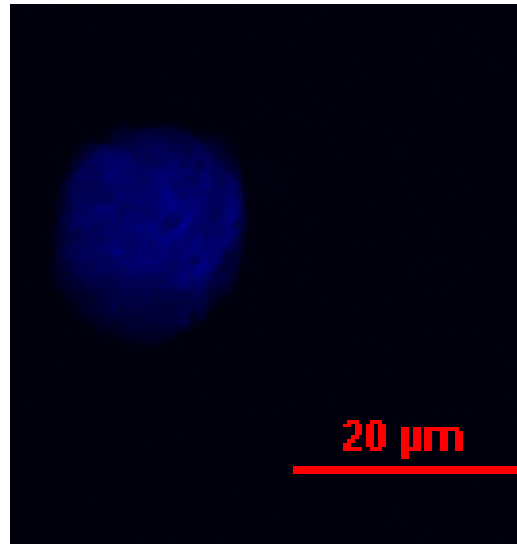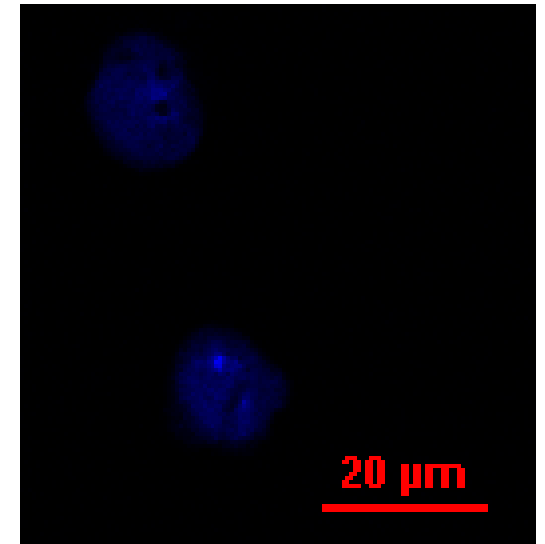

SCP3

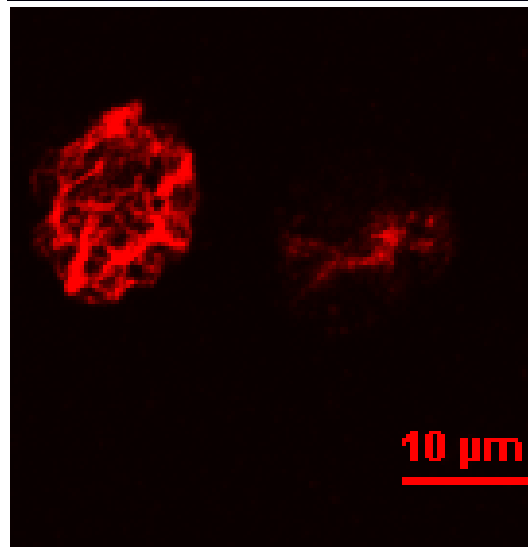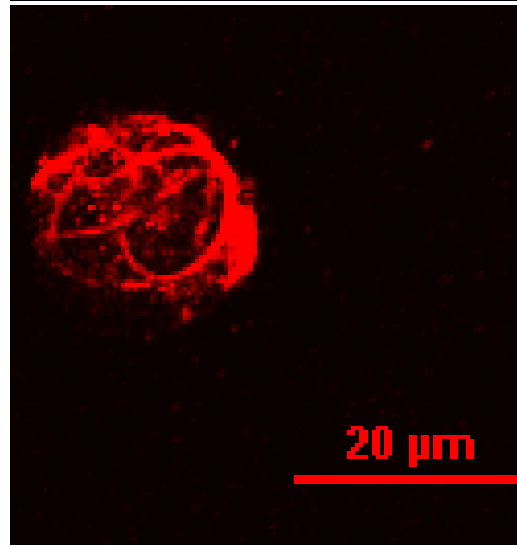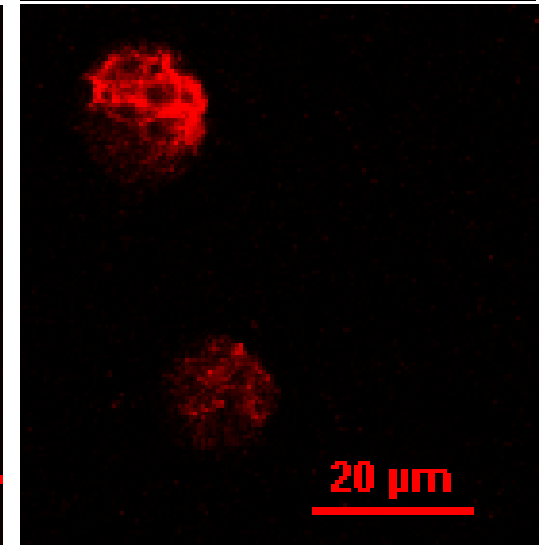

**Supplementary Figure 5.** SC formation in the induced hESCs. Extensive and elongated SYCP3 stainings can be detected in many induced cells.

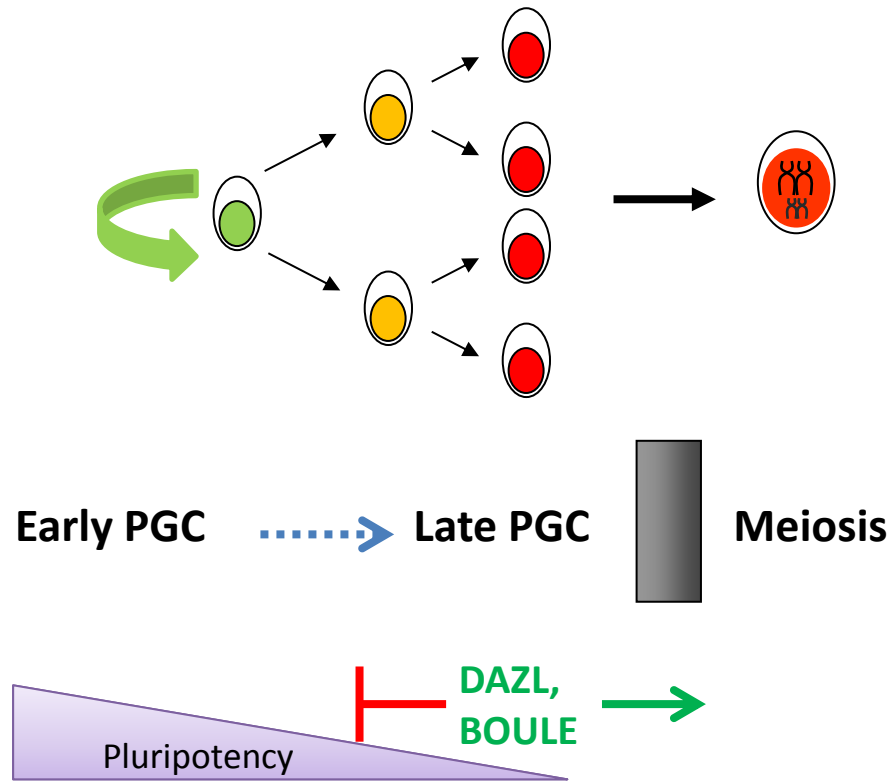

**Supplementary Figure 6.** Diagram depicting the regulatory roles of DAZL and BOULE in exit of pluripotency and initiation of meiosis during the development of germ cells from pluripotent stem cells.

## Stereo view

---

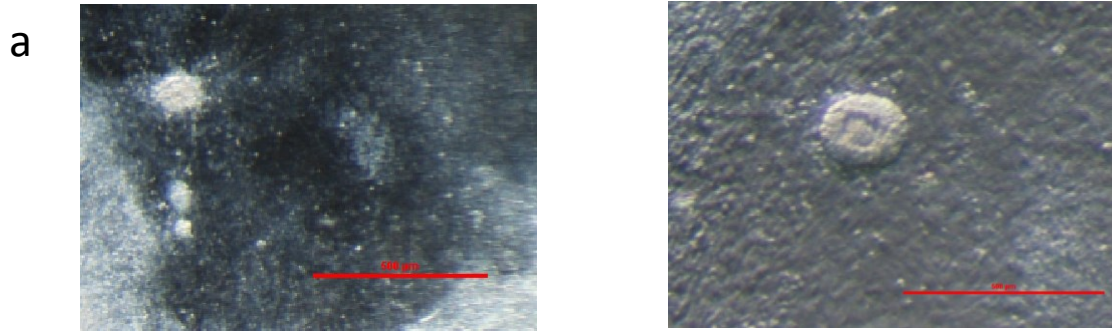

b

## Phase contrast view

---

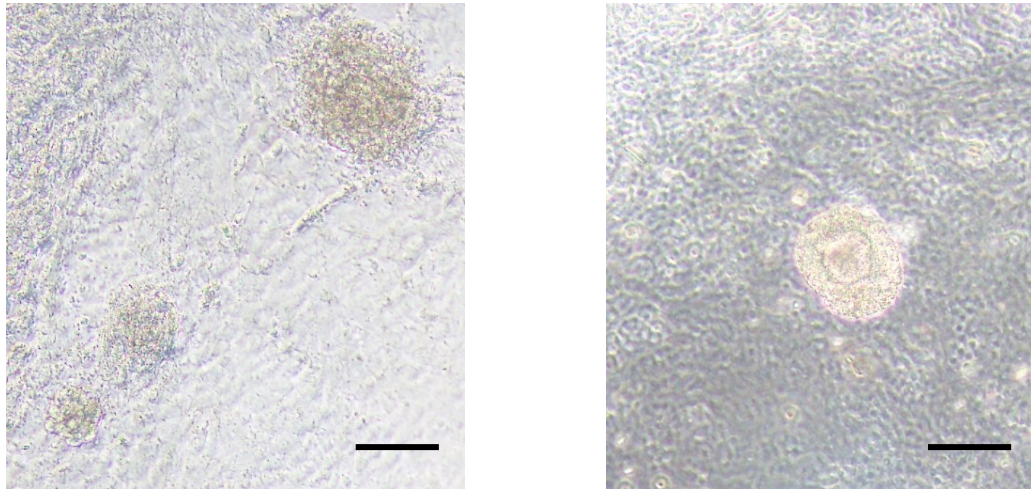

**Supplementary Figure 7. FLCs appeared in HSF6 hESC lines.** Using the same differentiation protocol as in H9 hESC line, HSF6 line also gave rise to FLCs with morphology resembling ovarian follicles. a. Two independent differentiation experiments recorded by stereo microscope with broader view of the differentiated cells. b. Phase contrast views with higher magnification of the FLCs shown in a.

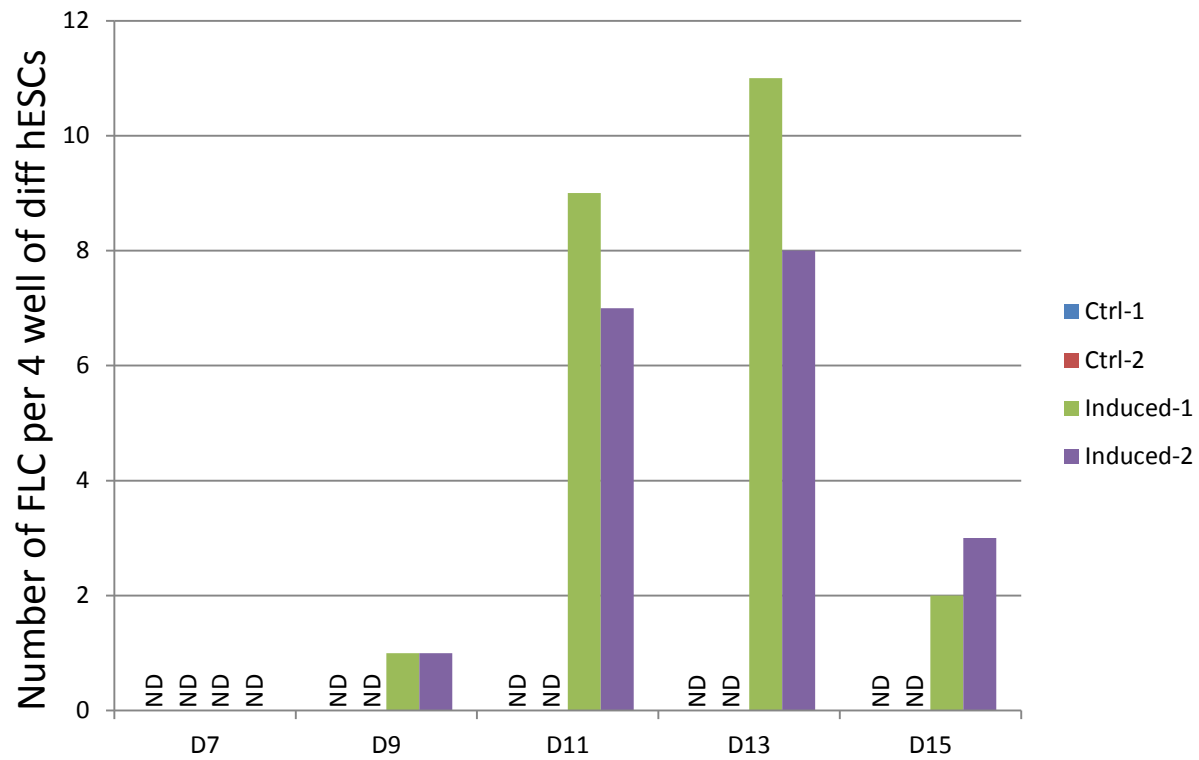

**Supplementary Figure 8.** Numbers of FLCs observed in the control and induced group from day 7 to day 15, each time point had 2 biological replicates of 4 wells containing approximately 50,000 cells.



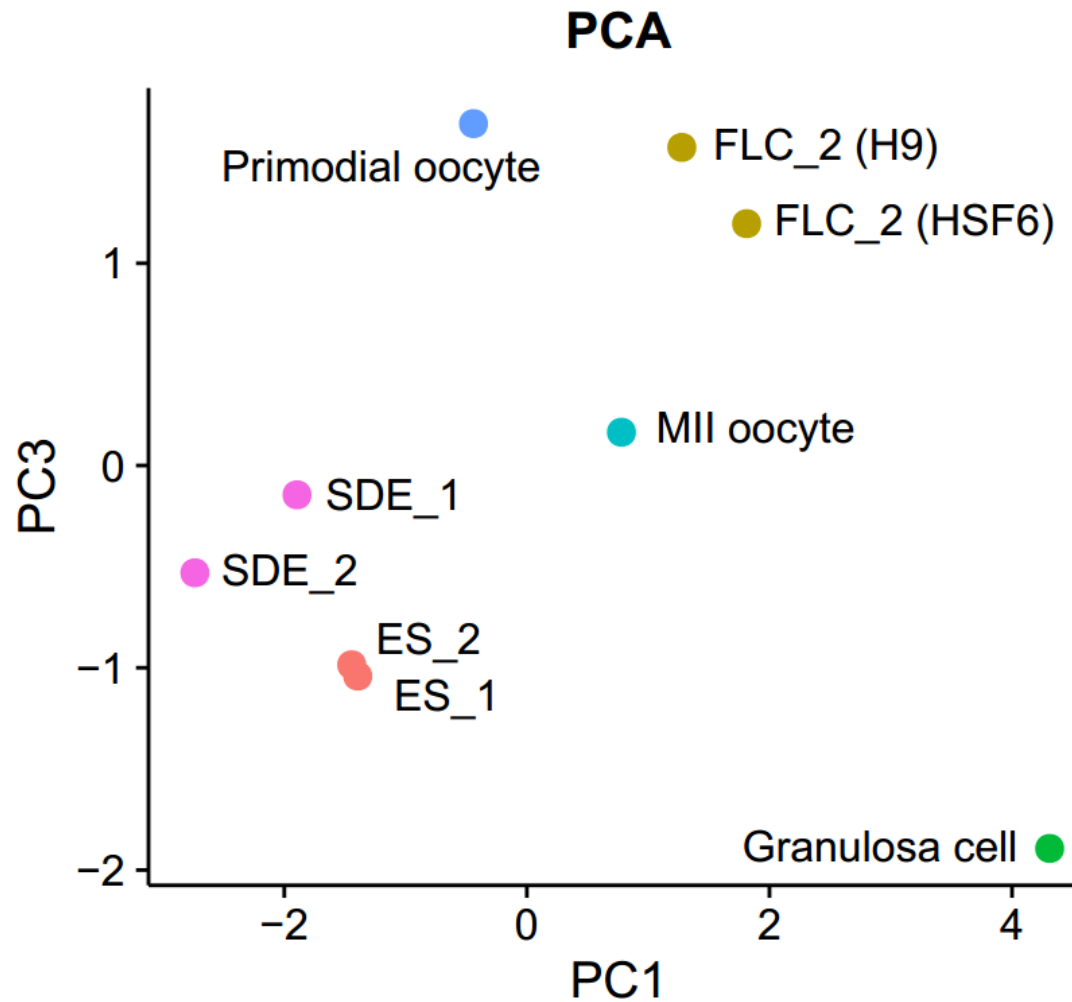

**Supplementary Figure 9.** Principal component analysis (PCA) of ES, SDE, FLC and primordial oocyte, MII oocyte, granulosa cell from published datasets. We combined the microarray data from in vivo datasets (primordial oocyte, MII oocyte and granulosa cells in Grøndahl et al., 2013) and our RNA-seq data (ES, SDE, and FLC) using the overlapping genes, and transformed it to a log<sub>2</sub> based value. Then we calculated the z-score across the genes for normalization. PCA analysis were carried out in R using the ‘reproduction’-related genes obtained from GO terms. PCA show that FLCs cluster closer to primordial oocytes than MII oocytes and granulosa cells, whereas SDE and ES cluster away from all three in vivo cell types, consistent with our conclusion that FLCs have similar expression pattern of in vivo primordial follicles.

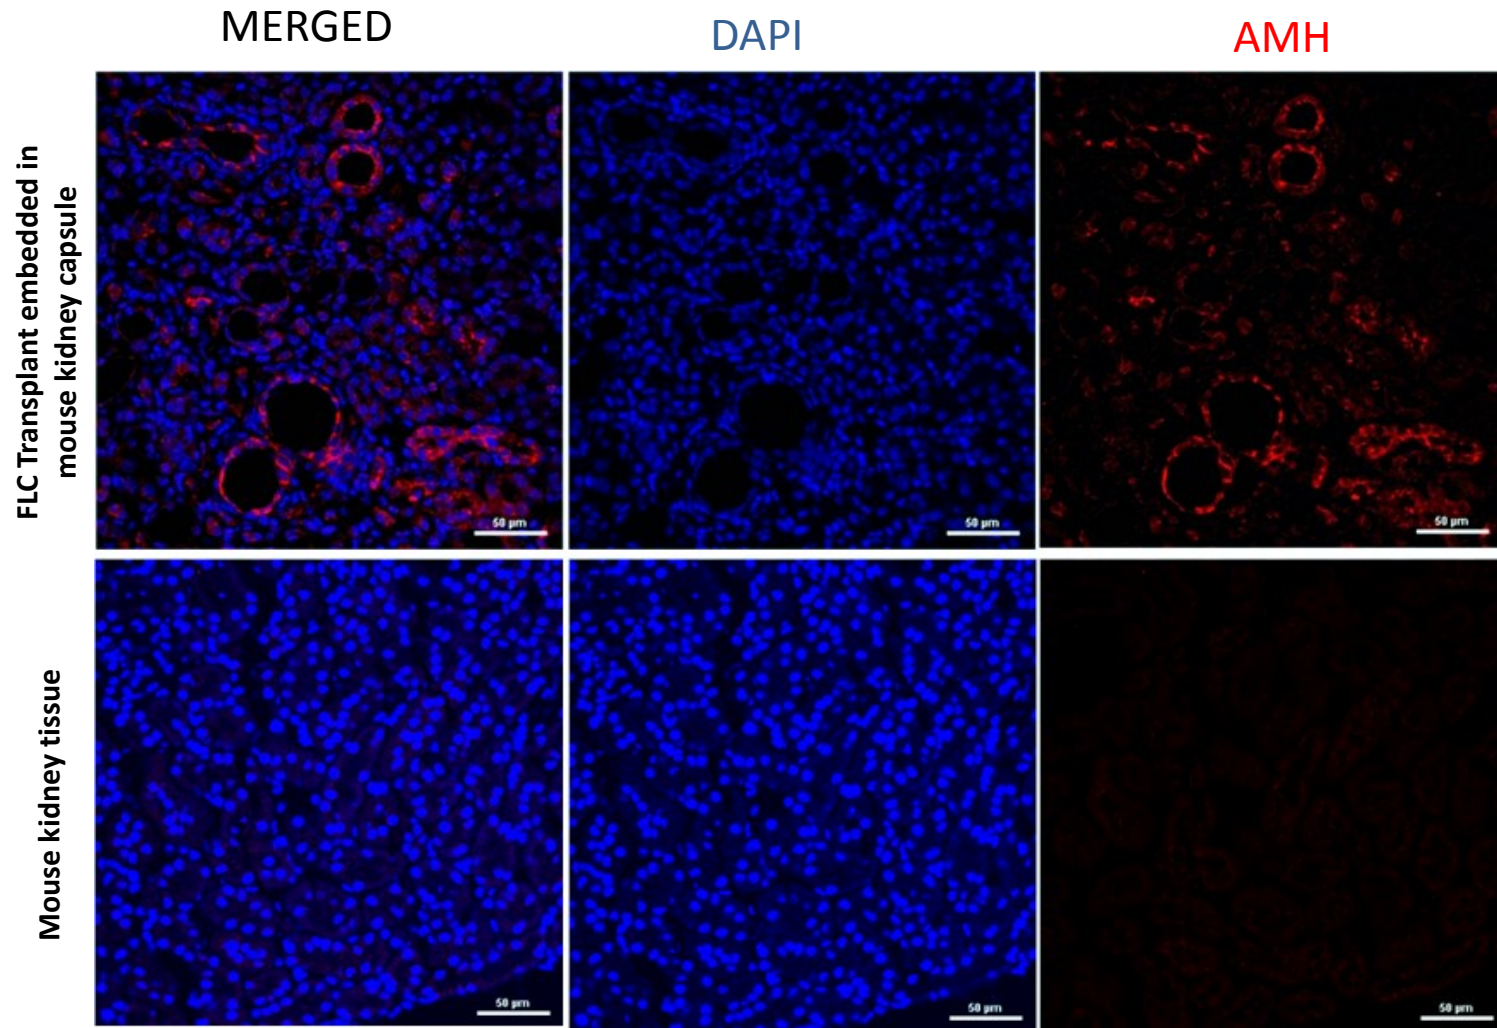

**Supplementary Figure 10. AMH positive cells only appeared in transplanted area.** Antibody raising against human AMH peptide was used to stain transplanted FLCs and mouse kidney tissue. No specific staining was observed in mouse tissue in contrast with strong signal of human AMH staining in tissue section of transplanted FLCs.

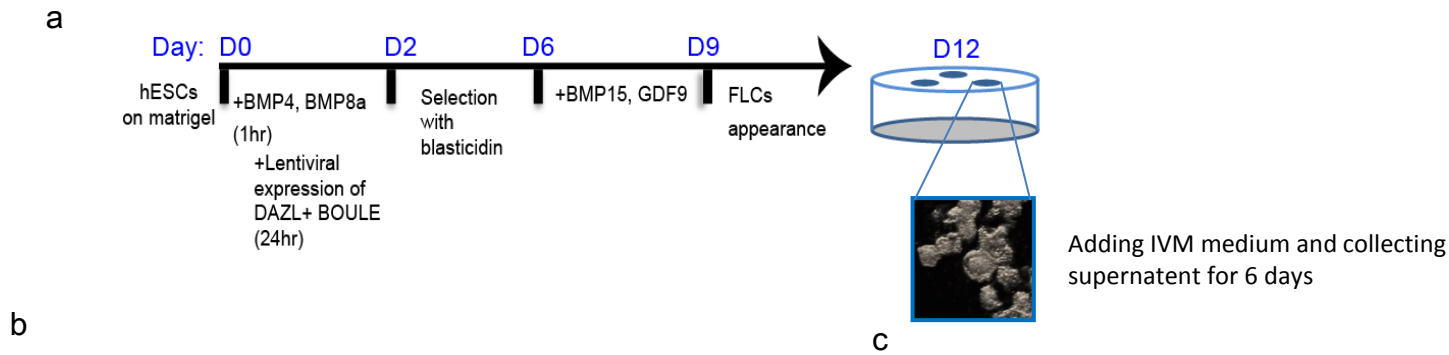

**b**

| Ctrl         |          |       |       | FLCs         |          |        |       |
|--------------|----------|-------|-------|--------------|----------|--------|-------|
| Sample (day) | Raw read | pg/mL | %B/Bo | Sample (day) | Raw read | pg/mL  | %B/Bo |
| H1           | 0.847    | NA    | 117.9 | H1           | 1.085    | 977.4  | 65.0  |
| H2           | 0.766    | NA    | 105.0 | H2           | 1.147    | 697.9  | 69.2  |
| H3           | 0.785    | NA    | 108.0 | H3           | 1.031    | 1290.7 | 61.3  |
| H4           | 0.684    | 65.4  | 91.9  | H4           | 1.06     | 1113.3 | 63.3  |
| H5           | 0.639    | 204.3 | 84.8  | H5           | 0.944    | 1982.9 | 55.4  |
| H6           | 0.709    | 20.8  | 95.9  | H6           | 1.101    | 897.8  | 66.1  |
|              |          |       |       |              |          |        |       |
| H1           | 0.765    | NA    | 104.8 | H1           | 1.204    | 500.2  | 73.1  |
| H2           | 0.76     | NA    | 104.0 | H2           | 1.146    | 701.8  | 69.2  |
| H3           | 0.755    | NA    | 103.2 | H3           | 1.109    | 860.1  | 66.6  |
| H4           | 0.698    | 37.7  | 94.2  | H4           | 1.039    | 1239.5 | 61.9  |
| H5           | 0.641    | 196.4 | 85.1  | H5           | 1.091    | 946.9  | 65.4  |
| H6           | 0.687    | 58.9  | 92.4  | H6           | 1.027    | 1945.6 | 61.1  |

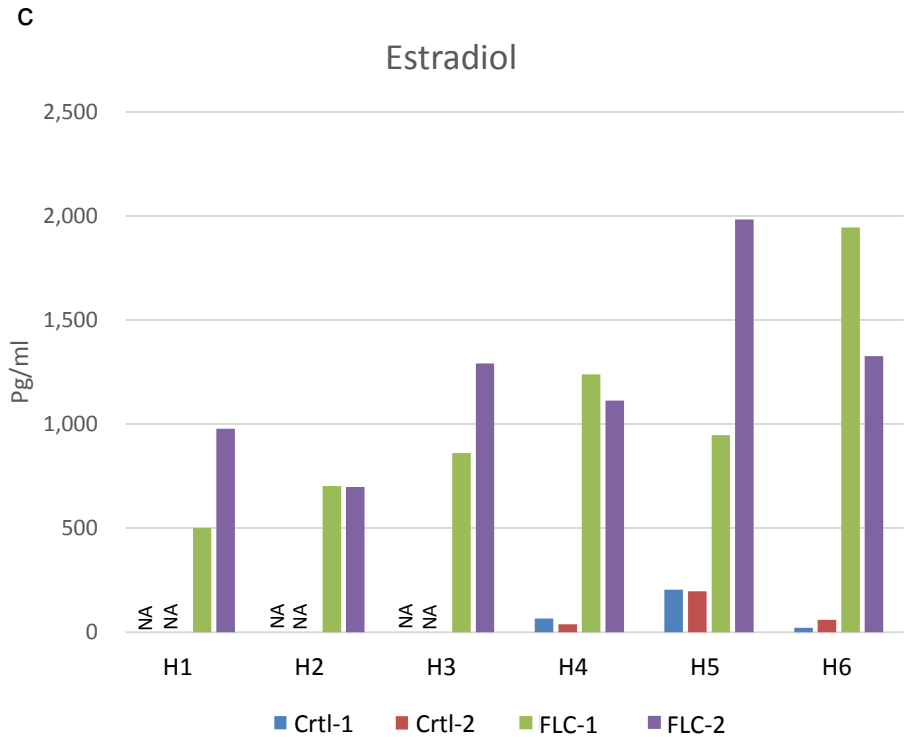

**Supplementary Figure 11. Estradiol detection of FLCs in IVM media.** a, H9 hESCs were differentiated as depicted in the diagram and FLCs were picked after D11. FLCs were transferred to hanging drop culture containing IVM media and the supernatant was collected each day (H1 to H6). B. Raw readings of estradiol measurements and the concentration of estradiol calculated from standard curve. Control (Ctrl) supernatant collected using spontaneously differentiated hESCs without inducers. Concentration is calculated according to manufacturer's equation :  $\text{logit}(B/Bo) = \ln[B/Bo/(1-B/Bo)]$ , taking into account the dilution. The calculated concentration is indicated as NA if the value is out of the detection limit of the assay. %B/BO is an index to indicate if the reading is reliable. %B/Bo above 80 is considered not accurate. c, Graph of the estradiol measurement in b. Each data point was plotted independently as concentration of estradiol. Each time point has two biological replicates of control or FLCs.

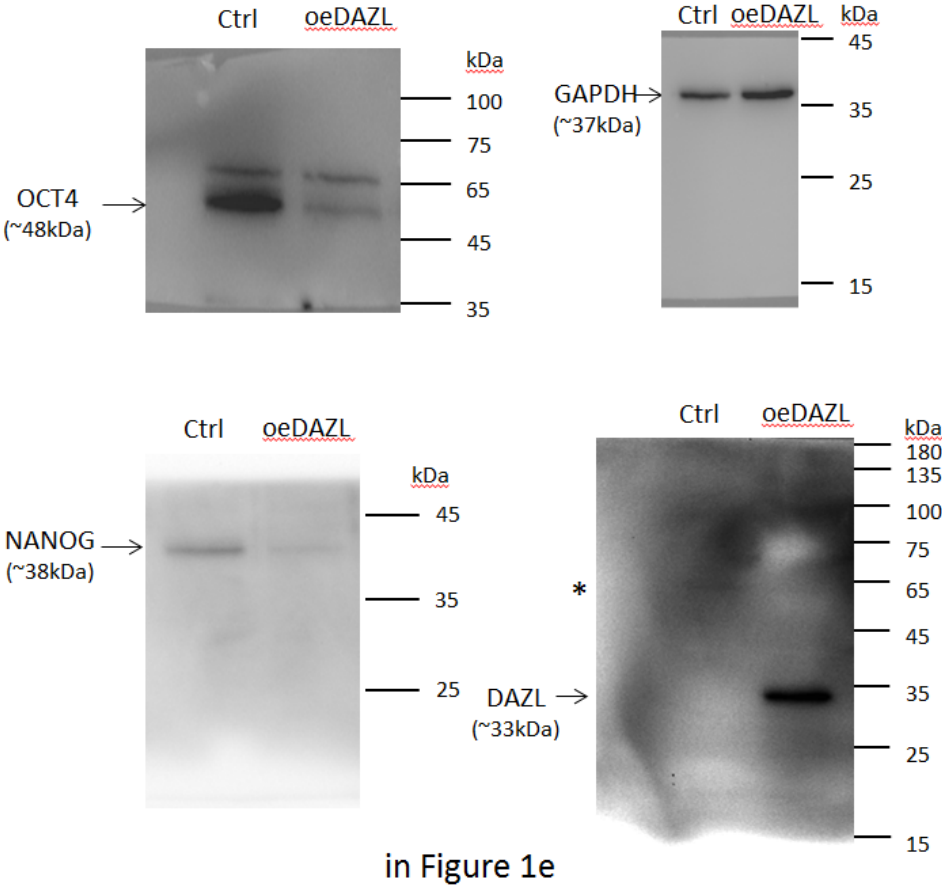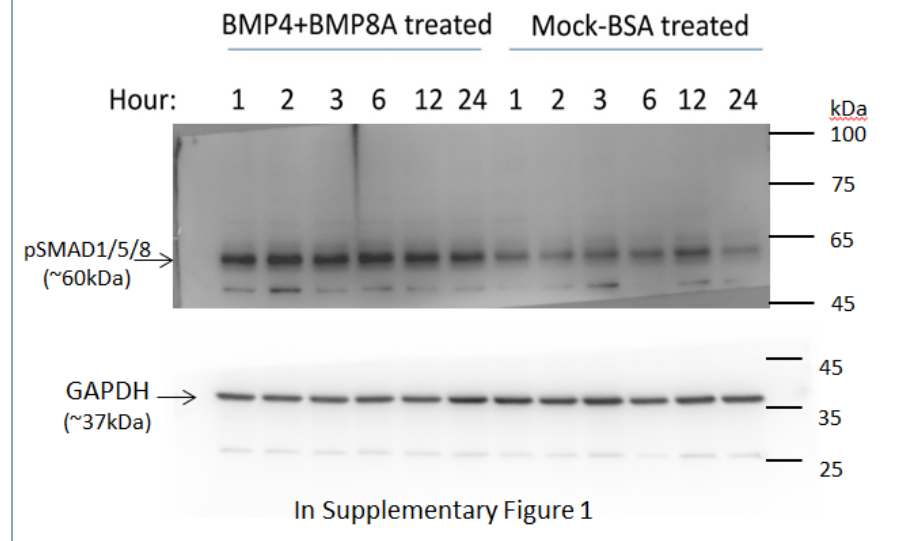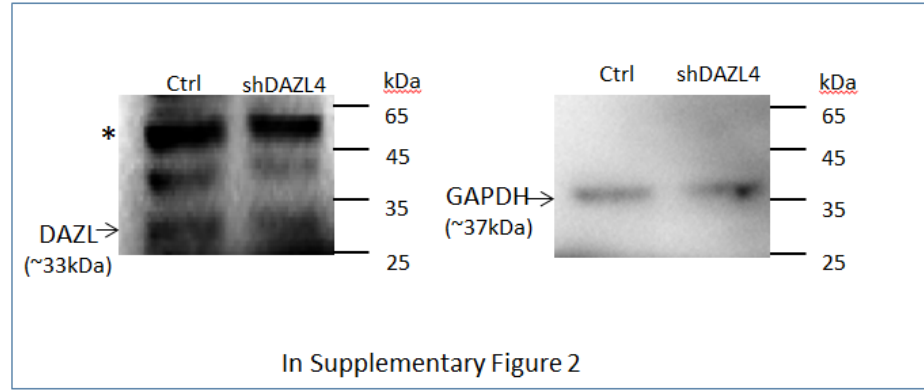

Supplementary Figure 12. Original blots of Western analysis shown in Figure 1e, Supplementary Figure 1 and 2. \*: non-specific bands

**Supplementary Table 1. Antibodies used in this study**

| <b>Primary/ Secondary antibodies</b> | <b>Source</b>      | <b>Dilution</b>           | <b>Cat no.</b>                     |
|--------------------------------------|--------------------|---------------------------|------------------------------------|
| <b>DAZL</b>                          | Mouse monoclonal   | IF, 1:50; Western 1:500   | MCA2336, AbD Serotec               |
| <b>OCT4</b>                          | Goat polyclonal    | IF, 1:100; Western 1:1000 | AF1759, R&D System                 |
| <b>OCT4</b>                          | Rabbit polyclonal  | 1:500                     | ab19857, Abcam                     |
| <b>BOULE</b>                         | Mouse monoclonal   | 1:100                     | ab57696, Abcam                     |
| <b>NANOG</b>                         | Rabbit polyclonal  | 1:100                     | ab21624, Abcam                     |
| <b>p-SMAD1/5/8</b>                   | Rabbit polyclonal  | Western 1:1000            | #9511s, Cell Signaling Technology  |
| <b>VASA</b>                          | Rabbit polyclonal  | 1:100                     | ab13840, Abcam                     |
| <b>GAPDH</b>                         | Mouse monoclonal   | 1:5000                    | 60004-1-Ig, Proteintech Group      |
| <b>ZP2</b>                           | Rabbit polyclonal  | 1:100                     | sc-30222, Santa Cruz Biotechnology |
| <b>NOBOX</b>                         | Rabbit polyclonal  | 1:100                     | ab41521, Abcam                     |
| <b>AMH</b>                           | Rabbit polyclonal  | 1:100                     | ab84952, Abcam                     |
| <b>PRDM9</b>                         | Rabbit polyclonal  | 1:100                     | 07-2070-I, Millipore               |
| <b><math>\gamma</math>H2AX</b>       | Mouse monoclonal   | 1:100                     | ab26350, Abcam                     |
| <b>SYCP3</b>                         | Rabbit polyclonal  | 1:100                     | NB300-232, Novus                   |
| <b>MLH1</b>                          | Mouse monoclonal   | 1:100                     | NA28, Calbiochem                   |
| <b>Alexa Fluor 488</b>               | Donkey anti-rabbit | 1:1000                    | A21206, Life technologies          |
| <b>Alexa Fluor 488</b>               | Donkey anti-mouse  | 1:1000                    | A21202, Life technologies          |
| <b>Alexa Fluor 633</b>               | Donkey anti-goat   | 1:1000                    | A21082, Life technologies          |
| <b>Alexa Fluor 555</b>               | Donkey anti-rabbit | 1:1000                    | A31572, Life technologies          |

**Supplementary Table 2. DNA Primers used in this study.**

| <b>Gene</b>         | <b>Forward Primer</b>       | <b>Reversed Primer</b>         | <b>Experiment</b>   |
|---------------------|-----------------------------|--------------------------------|---------------------|
| <b>GAPDH</b>        | TGTTGCCATCAATGACCCCTT       | CTCCACGACGTA CTACAGCG          | Q-PCR               |
| <b>OCT4</b>         | AGTGAGAGGCCAACCTGGAGA       | GTGAAGTGAGGGCTCCATA            | Q-PCR               |
| <b>NANOG</b>        | TTCCTTCCTCCATGGATCTG        | TCTGGAACCAGGTCTTCACC           | Q-PCR               |
| <b>PRDM14</b>       | GAGCCTTCAGGTCACAGAGC        | ACCTTCCCACATCTTTCACATC         | Q-PCR               |
| <b>VASA</b>         | AGCTGGGACATTCAATTCGAC       | GTTTGGCGCTGTTCCTTTGAT          | Q-PCR               |
| <b>SYCP3</b>        | TATTCAGGAAATCTGGGAAGCC      | GAGCCTTGTAATGTCAACTCCA         | Q-PCR               |
| <b>CYP19A</b>       | GTGGACGTGTTGACCCTTCT        | CAACTCAGTGGCAAAGTCCA           | Q-PCR               |
| <b>SOHLH2</b>       | GGTTGTATTT CAGGGCATGG       | CGAACTCTGACAACGAAGCA           | Q-PCR               |
| <b>ZP2</b>          | TCTTCTTCGCCCTTGTGACT        | CTCAGGGTGAGCTTTTCTGG           | Q-PCR               |
| <b>NOBOX</b>        | GCCAGAAAGCTGGAGAGAAG        | CAGTTCCTCACTCTGAGTGT           | Q-PCR               |
| <b>RSPO1</b>        | AAGTGCTACCCAAGCTGTT         | TTCACATTGCGCAGGACTAC           | Q-PCR               |
| <b>H1FOO</b>        | GTGAAAAGGCAGCCAAGAG         | CTGTAGGCCTCAGCATCTCC           | Q-PCR               |
| <b>CDC25A-3'UTR</b> | GGGCGGCAGGACCAGCCAGCA       | CAGAGCTTCCAACAGTTGGTTAGTA      | 3'UTR amplification |
| <b>CDC25B-3'UTR</b> | GGGGCCTGCGCCAGTCCTGCTA      | CGTGACTCGTTCAACTCTTTGGTTCGT    | 3'UTR amplification |
| <b>VASA-3'UTR</b>   | AGCCAAAACATCCTTCAAGTCTG     | TAAGGGAAAAGTGTTCATCCTTTA       | 3'UTR amplification |
| <b>SYCP3-3'UTR</b>  | TGACTCTTTGAAGAAAGAACTTGAACC | TAAAATTAATCGTCTTTATTTAATTGACAG | 3'UTR amplification |
